# Supplementary material
Source: PubMed Central journal article supplement (PMC3324033)
Supplement: 1111413109_pnas.201111413SI.pdf [file 1111413109_pnas.201111413SI.pdf]

# Supporting Information

Lee et al. 10.1073/pnas.1111413109

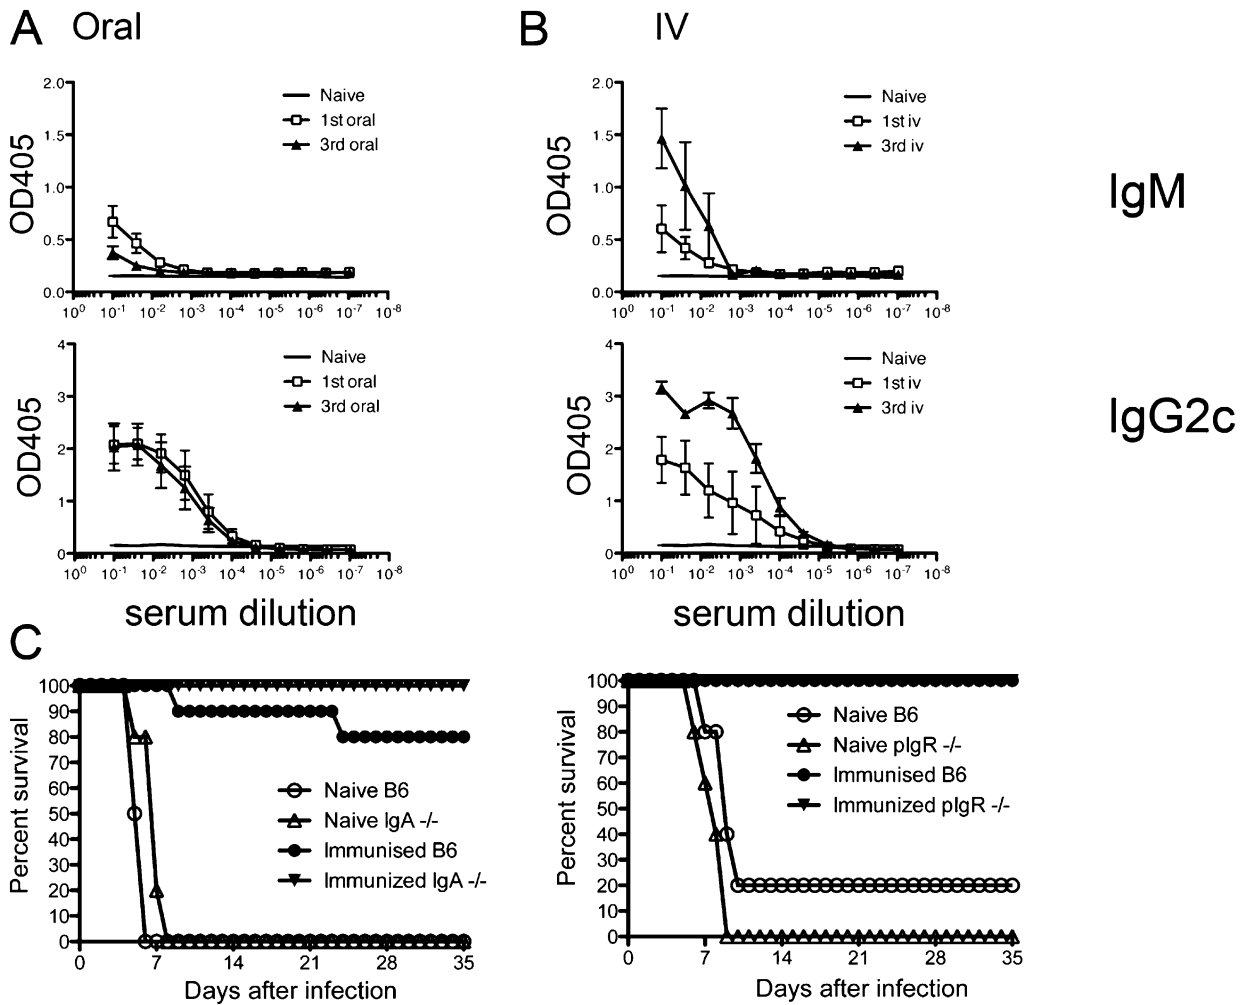

**Fig. S1.** Vaccination with attenuated *Salmonella* induces a systemic antibody response. C57BL/6 mice were infected (A) orally with  $5 \times 10^9$  or (B) i.v. with  $5 \times 10^5$  BRD509. Some mice received a single immunization, and other mice were immunized three times with 1 mo between doses. Blood was obtained from the retro-orbital plexus 55 d after immunization, serum was prepared, and *Salmonella*-specific IgM (Upper) and IgG2c (Lower) were measured by ELISA. Line graphs show mean absorbance  $\pm$  SEM of four mice per group. (C) C57BL/6 mice and (Left) IgA-deficient (*IgA*<sup>-/-</sup>) or (Right) polymeric IgReceptor-deficient (*IgR*<sup>-/-</sup>) mice were immunized orally with  $5 \times 10^9$  BRD509, and 42 d later naive or immunized mice were infected orally with  $5 \times 10^7$  virulent *Salmonella* SL1344. Line graphs represent the percentage of survival of the infected mice and at least six to eight mice per group.





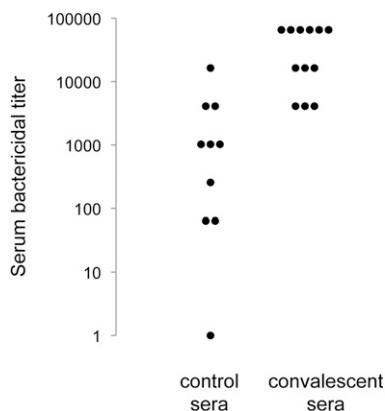

**Fig. S4.** Serum bactericidal titers against the invasive Malawian serovar Typhimurium strain D23580 in control and convalescent Malawian child sera following invasive *Salmonella* disease. *Salmonella* was added to serum from control or convalescent individuals, and complement-mediated bacterial killing was measured as described in *Materials and Methods*. Titer is the maximum dilution that can effect a 0.5 log<sub>10</sub> kill at 180 min in the serum bactericidal assay.

**Table S1.** *Salmonella* proteins recognized in three of four infected mouse strains

| Antigen no. | Symbol | Product name                                        | Predicted location   | Comments                                                 |
|-------------|--------|-----------------------------------------------------|----------------------|----------------------------------------------------------|
| 1850        | ompA   | Outer membrane protein A                            | Outer membrane       | Target antigen in mice and humans (1–3)                  |
| 4225        | phoN   | Nonspecific acid phosphatase precursor              | Periplasmic          | Target antigen in human typhoid (1)                      |
| 2229        | rlpA   | Rare lipoprotein A                                  | Unknown              |                                                          |
| 1594        | pspB   | Phage shock protein B                               | Cytoplasmic          |                                                          |
| 2128        | tolB   | Translocation protein B                             | Periplasmic          |                                                          |
| 0500        | dedD   | DedD protein                                        | Unknown              |                                                          |
| 0336        | yfgL   | Outer membrane protein assembly complex subunit     | Unknown              |                                                          |
| 1244        | lppB   | Major outer membrane lipoprotein                    | Unknown              |                                                          |
| 3426        | pin    | Putative regulatory protein                         | Unknown              |                                                          |
| 0097        | djlA   | DNA-J like membrane chaperone protein               | Cytoplasmic membrane |                                                          |
| 0754        | wza    | Putative polysaccharide export protein              | Outer membrane       |                                                          |
| 2127        | pal    | Peptidoglycan-associated outer membrane lipoprotein | Outer membrane       |                                                          |
| 2239        | pagP   | Palmitoyl transferase for lipid A                   | Outer membrane       |                                                          |
| 3234        | rpoN   | Hypothetical protein                                | Unknown              |                                                          |
| 1245        | lppA   | Major outer membrane lipoprotein                    | Unknown              |                                                          |
| 1119        | pagC   | Outer membrane invasion protein                     | Outer membrane       | Identified as a target antigen in human typhoid (1, 4)   |
| 4616        | smp    | Putative membrane protein                           | Unknown              |                                                          |
| 0029        | nhaA   | Putative exported protein                           | Unknown              |                                                          |
| 2294        | ykgB   | Hypothetical protein                                | Cytoplasmic          |                                                          |
| 1155        | yeaD   | Hypothetical protein                                | Unknown              |                                                          |
| 0013        | dnaJ   | Chaperone protein                                   | Cytoplasmic          |                                                          |
| 4239        | pilL   | Hypothetical protein                                | Unknown              |                                                          |
| 4554        | uxuR   | Hypothetical protein                                | Unknown              |                                                          |
| 0906        | fliH   | Flagellar assembly protein H                        | Unknown              |                                                          |
| 1780        | csgF   | Curli assembly protein F                            | Unknown              | Identified as a target antigen in human typhoid (4)      |
| 4155        | aphA   | Acid phosphatase/phosphotransferase                 | Unknown              |                                                          |
| 0918        | fliC   | Flagellin                                           | Extracellular        | Identified as a target antigen in mice and humans (5, 6) |
| 2126        | ybgF   | Hypothetical protein                                | Unknown              |                                                          |
| 3874        | viaD   | Putative outer membrane lipoprotein                 | Outer membrane       |                                                          |

- Charles RC, et al. (2010) Characterization of anti-*Salmonella enterica* serotype Typhi antibody responses in bacteremic Bangladeshi patients by an immunoaffinity proteomics-based technology. *Clin Vaccine Immunol* 17:1188–1195.
- Ortiz V, Isibasi A, Garcia-Ortigoza E, Kumate J (1989) Immunoblot detection of class-specific humoral immune response to outer membrane proteins isolated from *Salmonella typhi* in humans with typhoid fever. *J Clin Microbiol* 27:1640–1645.
- Brown A, Hormaeche CE (1989) The antibody response to *Salmonellae* in mice and humans studied by immunoblots and ELISA. *Microb Pathog* 6:445–454.
- Harris JB, et al. (2006) Identification of in vivo-induced bacterial protein antigens during human infection with *Salmonella enterica* serovar Typhi. *Infect Immun* 74:5161–5168.
- Sadallah F, et al. (1990) Production of specific monoclonal antibodies to *Salmonella typhi* flagellin and possible application to immunodiagnosis of typhoid fever. *J Infect Dis* 161:59–64.
- Calderón I, et al. (1986) Antibodies to porin antigens of *Salmonella typhi* induced during typhoid infection in humans. *Infect Immun* 52:209–212.

**Table S2. Clinical features of Malawian children with Salmonella bacteremia**

| Patient no | Age (mo) | Sex | Serovar     | Source | MDR | Clinical presentation                                        | HIV | Other diagnoses and comorbidities |
|------------|----------|-----|-------------|--------|-----|--------------------------------------------------------------|-----|-----------------------------------|
| 1          | 2        | F   | Typhimurium | CSF    |     | Fever, convulsions, vomiting                                 | +   | Meningitis                        |
| 2          | 4        | M   | Typhimurium | Blood  | √   | Fever, cough and shortness of breath, diarrhea, and vomiting |     | Severe pneumonia, malnutrition    |
| 3          | 6        | M   | Typhimurium | Blood  | √   | Fever, cough                                                 |     |                                   |
| 4          | 10       | F   | Typhimurium | Blood  | √   | Fever, cough                                                 |     |                                   |
| 5          | 13       | F   | Typhimurium | Blood  | √   | Fever, shortness of breath, diarrhea, and vomiting           |     | Severe malarial anemia            |
| 6          | 15       | M   | Typhimurium | Blood  | √   | Fever, diarrhea, and vomiting                                | +   |                                   |
| 7          | 16       | M   | Typhimurium | Blood  | √   | Fever, cough, diarrhea, and vomiting                         | +   | Malnutrition                      |
| 8          | 20       | F   | Typhimurium | Blood  | √   | Fever, cough, vomiting                                       |     |                                   |
| 9          | 43       | M   | Typhimurium | Blood  | √   | Fever                                                        | +   |                                   |
| 10         | 72       | F   | Typhimurium | Blood  | √   | Fever                                                        |     | Moderate anemia                   |
| 11         | 90       | F   | Typhi       | Blood  |     | Fever, cough                                                 |     |                                   |
| 12         | 151      | M   | Typhi       | Blood  |     | Fever, cough, and shortness of breath                        |     | Moderate anemia                   |

M, male; F, female; MDR, multidrug resistant (resistant to cotrimoxazole, ampicillin, and chloramphenicol).

**Table S3. List of 14 antigens differentially reactive in human NTS patients vs. controls**

| Human NTS antigens | C57BL/6 | BALB/c | C3H/HeJ | B6x129 | Gene | Product name (from NCBI)                            |
|--------------------|---------|--------|---------|--------|------|-----------------------------------------------------|
| 4225               | +       | +      | +       | +      | phoN | Nonspecific acid phosphatase precursor              |
| 1850               | +       | +      | +       | +      | ompA | Outer membrane protein A                            |
| 1449               | +       |        | +       |        | hyaF | Putative exported protein                           |
| 2070               | +       |        |         |        | ybhF | HlyD-family secretion protein                       |
| 2126               |         | +      | +       | +      | ybgF | Hypothetical protein                                |
| 4155               |         | +      | +       | +      | aphA | Acid phosphatase/phosphotransferase                 |
| 2864               |         | +      | +       |        | relA | Hypothetical protein                                |
| 4189               |         |        | +       |        | nrfG | Formate-dependent nitrite reductase complex subunit |
| 3119               |         |        |         |        |      | Putative exported protein                           |
| 2941               |         |        |         |        |      | Conserved hypothetical protein                      |
| 1459               |         |        |         |        |      | Putative secreted hydrolase                         |
| 1266               |         |        |         |        | sseB | Pathogenicity island effector protein               |
| 0510               |         |        |         |        | hisJ | Histidine-binding periplasmic protein               |
| 3708               |         |        |         |        | hslT | Putative lipoprotein                                |

NTS, non-Typhi *Salmonella*; NCBI, National Center for Biotechnology Information.

## Other Supporting Information Files

[Dataset S1 \(XLS\)](#)

[Dataset S2 \(XLS\)](#)
